# Supplementary material
Source: publisher site journal article supplement (https://www.degruyterbrill.com/publication/isbn/9783110261523/downloadAsset/9783110261523_Contents.pdf)
Supplement: Supplementary file 1 [file 9783110261523_Contents.pdf]

# Contents

|                      |    |
|----------------------|----|
| List of contributors | ix |
|----------------------|----|

|                     |    |
|---------------------|----|
| Introduction        | xi |
| <i>Steve Parker</i> |    |

## **Part 1: Sonority and Phonotactics**

|                                                                                      |   |
|--------------------------------------------------------------------------------------|---|
| Sonority and sonority-based relationships within American English monosyllabic words | 3 |
| <i>Karen Baertsch</i>                                                                |   |

|                                                |    |
|------------------------------------------------|----|
| The role of sonority in the phonology of Latin | 39 |
| <i>András Cser</i>                             |    |

|                                                        |    |
|--------------------------------------------------------|----|
| Is the Sonority Sequencing Principle an epiphenomenon? | 65 |
| <i>Eric Henke, Ellen M. Kaisse and Richard Wright</i>  |    |

|                                                                  |     |
|------------------------------------------------------------------|-----|
| Sonority distance vs. sonority dispersion – a typological survey | 101 |
| <i>Steve Parker</i>                                              |     |

|                                                                                                |     |
|------------------------------------------------------------------------------------------------|-----|
| Sonority variation in Stochastic Optimality Theory:<br>Implications for markedness hierarchies | 167 |
| <i>Jennifer L. Smith and Elliott Moreton</i>                                                   |     |

|                                                  |     |
|--------------------------------------------------|-----|
| Sonority intuitions are provided by the lexicon  | 195 |
| <i>Ruben van de Vijver and Dinah Baer-Henney</i> |     |

## **Part 2: Sonority and Phonetics**

|                                                                                                      |     |
|------------------------------------------------------------------------------------------------------|-----|
| Sonority and central vowels: A cross-linguistic phonetic study                                       | 219 |
| <i>Matthew Gordon, Edita Ghushchyan, Bradley McDonnell,<br/>Daisy Rosenblum and Patricia A. Shaw</i> |     |

|                         |     |
|-------------------------|-----|
| Sonority and the larynx | 257 |
| <i>Brett Miller</i>     |     |

|                                                                                               |     |
|-----------------------------------------------------------------------------------------------|-----|
| Articulatory bases of sonority in English liquids<br><i>Michael Proctor and Rachel Walker</i> | 289 |
|-----------------------------------------------------------------------------------------------|-----|

**Part 3:**  
**Sonority and Language Acquisition**

|                                                                                                          |     |
|----------------------------------------------------------------------------------------------------------|-----|
| The Sonority Dispersion Principle in the acquisition of Hebrew word<br>final codas<br><i>Outi Bat-El</i> | 319 |
|----------------------------------------------------------------------------------------------------------|-----|

**Part 4:**  
**Sonority and Sign Language**

|                                                                                             |     |
|---------------------------------------------------------------------------------------------|-----|
| Acceleration peaks and sonority in Finnish Sign Language syllables<br><i>Tommi Jantunen</i> | 347 |
|---------------------------------------------------------------------------------------------|-----|

**Part 5:**  
**Sonority and Computational Modeling**

|                                                                                                                          |     |
|--------------------------------------------------------------------------------------------------------------------------|-----|
| Sonority and syllabification in a connectionist network:<br>An analysis of BrbrNet<br><i>Paul Tupper and Michael Fry</i> | 385 |
|--------------------------------------------------------------------------------------------------------------------------|-----|

|            |     |
|------------|-----|
| References | 411 |
|------------|-----|

|              |     |
|--------------|-----|
| Author index | 473 |
|--------------|-----|

|                                                       |     |
|-------------------------------------------------------|-----|
| Index of languages, dialects, and linguistic families | 481 |
|-------------------------------------------------------|-----|

|               |     |
|---------------|-----|
| Subject index | 485 |
|---------------|-----|
